# Supplementary material for: A putative silencer variant in a spontaneous canine model of retinitis pigmentosa
Source: PLoS Genet. 2020 Mar 9;16(3):e1008659. doi: 10.1371/journal.pgen.1008659 (PMC7082071; doi:10.1371/journal.pgen.1008659)
Supplement: S1 Table — Control dogs used for filtering the whole-genome sequencing data (numbers per breed). (XLSX) [file pgen.1008659.s004.xlsx]

## Sheet: Sheet1
Breed	Number of dogs
Afghan Hound	1
Airedale Terrier	4
Akita	3
Alaskan Malamute	2
American Hairless Terrier	2
Australian Cattle Dog	2
Australian Kelpie	6
Beagle	1
Bearded Collie	7
Belgian Shepherd Dog	4
Bichon Frisé	3
Border Collie	56
Cairn Terrier	2
Central Asian Shepherd Dog	1
Dachshund	3
Dalmatian	5
Dandie Dinmont Terrier	1
Deerhound	1
Dobermann	4
Dutch Shepherd Dog	2
Elo	1
English Springer Spaniel	1
Entelbuch Cattle Dog	8
Eurasier	2
Finnish Lapphund	2
Finnish Reindeer Herder	2
Finnish Spitz	2
Flanders Cattle Dog	2
French Bulldog	1
German Pinscher	4
German Pointing Dog	1
Mixed breed	1
German Shepherd Dog	3
Greater Swiss Mountain Dog	1
Irish Soft Coated Wheaten Terrier	3
Irish Terrier	1
Italian Greyhound	2
Karelian Bear Dog	6
Kromfohrländer	1
Kuvasz	1
Labrador Retriever	44
Lagotto Romagnolo	7
Lancashire Heeler	1
Landseer	2
Leonberger	7
Miniature Schnauzer	1
Norwich Terrier	5
Parson Russell Terrier	4
Rhodesian Ridgeback	5
Rottweiler	3
Russian Black Terrier	4
Saluki	4
Siberian Husky	3
Sloughi	3
Spanish Waterdog	1
Stabyhoun	3
Tibetan Mastiff	3
Tibetan Spaniel	1
Welsh Springer Spaniel	2
West Highland White Terrier	2
Whippet	2
White Swiss Shepherd Dog	5
Yorkshire Terrier	1
Total	268
